# Supplementary material for: Oncolytic DNX-2401 virotherapy plus pembrolizumab in recurrent glioblastoma: a phase 1/2 trial
Source: PubMed Central journal article supplement (PMC10287560; doi:10.1038/s41591-023-02347-y), 2023-05-15
Supplement: 41591_2023_2347_MOESM1_ESM.pdf [file 41591_2023_2347_MOESM1_ESM.pdf]

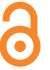

---

# **Oncolytic DNX-2401 virotherapy plus pembrolizumab in recurrent glioblastoma: a phase 1/2 trial**

---

In the format provided by the authors and unedited

---

## Supplementary Methods:

### Inclusion Criteria:

1.  $\geq 18$  years of age on the day of informed consent
2. A single glioblastoma or gliosarcoma tumor confirmed by documented historical histopathology.
  1. First or presenting second recurrence of glioblastoma or gliosarcoma (i.e., relapse following prior treatment) at time of consent. Approval may be given by Medical Monitor or designee to proceed with enrollment with a prior non-GBM/GS diagnosis, in which case transition to GBM/GS may be accepted as first recurrence of tumor.
  2. Gross total or partial tumor resection, including tumor debulking, is not possible or not planned
  3. A single measurable tumor that is at least 10.0 mm longest diameter (LDi) x 10.0 mm shortest diameter (SDi) and that does not exceed 40.0 mm in LDi or SDi on the Screening MRI
  4. The measurable area of the tumor is solid/nodular and is not cystic
  5. Willing to provide a stereotactic biopsy sample from the brain tumor obtained prior to DNX- 2401 administration
  6. Tumor must be accessible for stereotactic injection
  7. Evidence of tumor recurrence (e.g., progression after last treatment) on the Screening MRI (15 days to 72 hours prior to DNX-2401 administration)
  8. Tumor location that will not risk delivery of DNX-2401 into the ventricular system
3. Tumor recurrence or progression after previously failing surgical resection, chemotherapy or radiation
4. Resolution of toxic effect(s) of the most recent prior chemotherapy to Grade 1 or less (except neuropathy and alopecia)
5. Demonstrate adequate organ function as defined below:
  - Hematological
    1. Absolute neutrophil count (ANC)  $\geq 1,500$  cells/mm<sup>3</sup>
    2. WBC  $\geq 2.5 \times 10^3$  cells/mm<sup>3</sup>
    3. Platelets  $\geq 100,000$  cells/mm<sup>3</sup>
    4. Hemoglobin  $\geq 10$  g/dL or  $\geq 5.6$  mmol/L
    5. Absolute lymphocyte count (ALC)  $\geq 800$  cells/mm<sup>3</sup>
  - Renal
    1. Creatinine  $\leq 1.5$ x ULN
    2. BUN  $\leq 1.5$ x ULN
  - Hepatic
    1. Total bilirubin  $\leq 1.5$ x upper limit of normal (ULN)
      1. **Note:** In the event that total bilirubin is  $> 1.5$  X ULN, the subject may be eligible if the direct bilirubin level is  $\leq$  ULN, following consultation with the DNatrix Medical Monitor or designee.
    2. AST (SGOT) and ALT (SGPT)  $\leq 2.5$ x ULN
  - Coagulation
    1. International Normalized Ratio (INR)  $\leq 1.5$ x ULN
    2. Prothrombin Time (PT)  $\leq 1.5$ x ULN

3. Activated Partial Thromboplastin Time (aPTT)  $\leq 1.5 \times$  ULN
6. Adequate venous access
  7. Karnofsky performance status  $\geq 70\%$
  8. Afebrile at baseline/Day 0 prior to DNX-2401 administration (i.e.,  $< 38.0^{\circ}\text{C}$ )
  9. Prior anti-tumor therapies must have been completed within the following time periods prior to DNX-2401 injection:
    - 2 weeks after vincristine
    - 4 weeks after nitrosoureas
    - 3 weeks after procarbazine or temozolomide
    - 4 weeks after bevacizumab, other antibody therapy or other anti-angiogenic therapy to treat glioblastoma
    - 5 half-lives for other anti-cancer agents or 2 weeks after the last dose when the half-life is unknown. A discussion of these agents will take place with the DNAtrix Medical Monitor or designee prior to establishing eligibility.
  10. For applicable screening candidates, external beam radiotherapy ( $> 5000$  cGy) must have been completed at least 12 weeks prior to DNX-2401 administration
  11. Females who are not of childbearing potential must be documented as such and will not be tested for pregnancy or required to utilize contraception if they meet one or more of the following definitions of non-childbearing potential:
    - Amenorrheic for  $> 2$  years without a hysterectomy and bilateral oophorectomy and a FSH value in the postmenopausal range upon pre-trial (screening) evaluation
    - Post-hysterectomy, bilateral oophorectomy or tubal ligation. Tubal ligation must be confirmed with medical records of the actual procedure.
  12. Female subjects of childbearing potential must have a negative urine or serum pregnancy test within 24 hours prior to receiving DNX-2401 injection. If the urine test is positive or cannot be confirmed as negative, a serum pregnancy test will be required to confirm negative results. The serum pregnancy test must be negative for the subject to be eligible.
  13. Female subjects of childbearing potential must be willing to use two highly effective birth control methods throughout the study, starting with provision of informed consent through 180 days after the single dose of DNX-2401 and 120 days after the last dose of pembrolizumab. The two birth control methods can be either two barrier methods or a barrier method plus a hormonal method to prevent pregnancy.

Examples of highly effective birth control methods include the following:

- Using twice the normal protection of birth control (i.e., double-barrier) by using a condom AND spermicidal jelly or foam, or a diaphragm AND spermicidal jelly or foam. A spermicidal jelly or foam must be used in addition to a barrier method (e.g., condom or diaphragm)
- Oral contraceptive control pills
- Depot or injectable birth control
- Intrauterine Device (IUD)
- Transdermal contraceptive patch
- Vaginal contraceptive ring

14. Male subjects must agree to use an acceptable method of contraception throughout the study starting with provision of informed consent through 180 days after the single dose of DNX- 2401 and 120 days after the last dose of pembrolizumab.
15. Willing and able to provide informed consent, undergo and comply with all study assessments and adhere to the protocol schedule
16. Agree not to donate blood or gametes following DNX-2401 administration

Exclusion Criteria:

Subjects who meet any of the following exclusion criteria are not eligible for the study and must not be enrolled:

1. Recurrent GBM with multiple (> 2) separate enhancing tumors (measurable or non-measurable)
2. Tumor shape that is bi-lobular or multifocal tumor
3. Tumor involvement that would require ventricular, brainstem or posterior fossa injection or access through a ventricle or risk of ventricular penetration in order to deliver DNX-2401
4. Tumor involves both hemispheres or there is suspected cerebrospinal fluid (CSF) dissemination
5. Documented extracranial metastases
6. Requires, or based upon historical evidence, may require treatment with high-dose systemic corticosteroids defined as dexamethasone > 4 mg/day or bioequivalent for more than 3 consecutive days within 2 weeks prior to and following the first dose of pembrolizumab, or has demonstrated an inability to be tapered off of steroids
7. Uncontrolled blood-sugar levels defined as HbA1c > 7%
8. Active autoimmune disease that requires, or has required, systemic treatment in the past 2 years (i.e. with use of disease modifying agents, corticosteroids or immunosuppressive drugs)
9. Previous treatment with any checkpoint inhibitor (e.g., anti-PD-1, anti-PD-L1, or anti-PD-L2 agent) or with an agent directed to another stimulatory or co-inhibitory T-cell receptor (e.g., CTLA-4, OX-40, CD137), including pembrolizumab
10. History of (non-infectious) pneumonitis that required steroids or current pneumonitis
11. History of interstitial lung disease
12. Transfusions or medications (e.g., G-CSF) to treat pancytopenia or other hematological conditions within 4 weeks prior to DNX-2401 administration
13. Prior gene transfer therapy or prior therapy with cytolytic virus of any type
14. Live vaccines of any kind within 45 days prior to DNX-2401 administration and while participating in the study. Examples of live vaccines include, but are not limited to, the following: measles, mumps, rubella, varicella/zoster (chicken pox), yellow fever, rabies, BCG, and typhoid vaccine. Seasonal influenza vaccines for injection are generally killed virus vaccines and are permitted; however, intranasal influenza vaccines (e.g. Flu-Mist®) are live attenuated vaccines and are not allowed.
15. Major surgery within 4 weeks and minor surgery within 2 weeks of DNX-2401 administration (Refer to Appendix 2 – Major and Minor Surgery Definitions)
16. Participation in an investigational (invasive device, drug, or product) study or treatment with an investigational agent or device within 30 days prior to consent

17. Any contraindication for undergoing MRI such as: individuals with pacemakers, epicardial pacer wires, infusion pumps, surgical and/or aneurysm clips, shrapnel, metal prosthesis, implants with potential magnetic properties, or metallic bodies in the eyes
18. Is pregnant or breastfeeding, or planning to conceive or father children during the study, starting with the screening visit through 180 days after the single dose of DNX-2401 and 120 days after the last dose of pembrolizumab
19. Evidence of active uncontrolled infection or an unstable or severe intercurrent medical condition that requires treatment and/or precludes surgery
20. History of prior malignancy except for curatively treated basal or squamous cell carcinoma of the skin (non-melanoma skin cancer), cervical or vaginal intra-epithelial neoplasia, non-invasive breast cancer *in situ* or localized prostate cancer with a prostate specific antigen (PSA) of < 4.0 ng/mL (mcg/L) at Screening. Subjects with other curatively treated malignancies who had no evidence of metastatic disease and a > 2 year disease-free interval may be enrolled after approval by the DNAtrix Medical Monitor or designee.
21. Any medical condition that precludes intratumoral injection into the brain
22. Immunocompromised subjects or those with autoimmune conditions, human immunodeficiency virus (HIV), or active hepatitis (according to diagnostic serology results that are positive for active HAV, HBV [Anti-HBc and HBsAg] or HCV infection)
23. Pulmonary conditions including a known history of active tuberculosis (TB, *Mycobacterium tuberculosis*). TB testing is required for subjects recently exposed to persons with active TB or who have traveled recently to areas where TB is endemic.
24. Evidence of bleeding diathesis, hemorrhage, or coagulopathy or use of anticoagulant medication or any medication that may increase the risk of bleeding that cannot be stopped prior to surgery. If the medication can be discontinued prior to DNX-2401 injection, then the subject may be eligible following consultation with the DNAtrix Medical Monitor or designee.
25. Encephalitis, multiple sclerosis or other central nervous system (CNS) infection or primary CNS disease that would interfere with subject evaluation
26. Li-Fraumeni Syndrome or with a known germ line deficit in the retinoblastoma gene or its related pathways
27. Significant systemic or major illnesses including, but not limited to, congestive heart failure, ischemic heart disease, kidney disease or renal failure, organ transplantation or other conditions that may affect subject risk or protocol compliance
28. Alcohol or substance abuse or alcohol dependency within 12 months prior to screening that has caused health consequences
29. History or current diagnosis of any medical or psychological condition, and in particular, any unstable CNS condition such as delirium, confusion, etc., that might interfere with the subject's ability to comply with the study requirements or the ability to obtain informed consent

| Supplementary Table 1. Summary of adverse events by counts                                            |                                        |                                        |                                            |                |
|-------------------------------------------------------------------------------------------------------|----------------------------------------|----------------------------------------|--------------------------------------------|----------------|
|                                                                                                       | Cohort 1                               | Cohort 2                               | Cohort 3 /<br>Dose<br>expansion            | Total,<br>n=49 |
|                                                                                                       | 5x10 <sup>8</sup> vp DNX-<br>2401, n=4 | 5x10 <sup>9</sup> vp DNX-<br>2401, n=3 | 5x10 <sup>10</sup> vp<br>DNX-2401,<br>n=42 |                |
| <b>Total number of<br/>treatment emergent<br/>AE</b>                                                  | 26                                     | 78                                     | 672                                        | 776            |
| <b>Grade 1</b>                                                                                        | 8                                      | 41                                     | 389                                        | 438            |
| <b>Grade 2</b>                                                                                        | 13                                     | 26                                     | 205                                        | 244            |
| <b>Grade 3</b>                                                                                        | 5                                      | 11                                     | 73                                         | 89             |
| <b>Grade 4</b>                                                                                        | 0                                      | 0                                      | 4                                          | 4              |
| <b>Grade 5</b>                                                                                        | 0                                      | 0                                      | 1                                          | 1              |
| <b>Total number of<br/>treatment emergent<br/>SAE</b>                                                 | 5                                      | 1                                      | 43                                         | 49             |
| <b>Grade 1</b>                                                                                        | 0                                      | 0                                      | 1                                          | 1              |
| <b>Grade 2</b>                                                                                        | 3                                      | 1                                      | 11                                         | 15             |
| <b>Grade 3</b>                                                                                        | 2                                      | 0                                      | 27                                         | 29             |
| <b>Grade 4</b>                                                                                        | 0                                      | 0                                      | 3                                          | 3              |
| <b>Grade 5</b>                                                                                        | 0                                      | 0                                      | 1                                          | 1              |
| Shown are total counts of adverse events, AE denotes adverse event, SAE denotes serious adverse event |                                        |                                        |                                            |                |

Supplementary Table 2. Bevacizumab use during treatment phase.

| Subject ID | Start Date (study day) | End date (study day) | Dose | Unit  | Frequency     | Indication                          |
|------------|------------------------|----------------------|------|-------|---------------|-------------------------------------|
| 2401007    | 54                     | 54                   | 735  | ml    | once          | Prophylaxis: edema                  |
| 2401023    | 32                     | 60                   | 5    | mg/kg | every 2 weeks | Adverse event: vasogenic edema      |
| 2401025    | 37                     | 63                   | 5    | mg/kg | every 2 weeks | Adverse event: vasogenic edema      |
|            | 98                     | 126                  | 5    | mg/kg | every 2 weeks | Adverse event: vasogenic edema      |
| 2401026    | 43                     | 70                   | 3    | mg/kg | every 2 weeks | Adverse event: vasogenic edema      |
|            | 103                    | 147                  | 5    | mg/kg | every 2 weeks | Adverse event: vasogenic edema      |
| 2401036    | 103                    | 103                  | 410  | mg    | once          | Adverse event: left sided weakness  |
|            | 122                    | 122                  | 420  | mg    | once          | Adverse event: left sided weakness  |
|            | 145                    | 145                  | 420  | mg    | once          | Adverse event: left sided weakness  |
| 2401037    | 82                     | 82                   | 340  | mg    | once          | Adverse event: vasogenic edema      |
|            | 93                     | 93                   | 340  | mg    | once          | Adverse event: vasogenic edema      |
|            | 109                    | 109                  | 340  | mg    | once          | Adverse event: vasogenic edema      |
| 2401038    | 60                     | 60                   | 330  | mg    | once          | Adverse event: vasogenic edema      |
|            | 81                     | 81                   | 330  | mg    | once          | Adverse event: vasogenic edema      |
|            | 102                    | 102                  | 330  | mg    | once          | Adverse event: vasogenic edema      |
| 2401040    | 54                     | 54                   | 5    | mg/kg | once          | Adverse event: vasogenic edema      |
|            | 71                     | 71                   | 5    | mg/kg | once          | Adverse event: vasogenic edema      |
|            | 85                     | 85                   | 5    | mg/kg | once          | Adverse event: vasogenic edema      |
|            | 97                     | 97                   | 10   | mg/kg | once          | Adverse event: right sided weakness |
| 2401041    | 75                     | 75                   | 5    | mg/kg | once          | Adverse event: vasogenic edema      |
|            | 96                     | 96                   | 5    | mg/kg | once          | Adverse event: vasogenic edema      |
|            | 173                    | 173                  | 10   | mg/kg | once          | Adverse event: vasogenic edema      |
| 2401042    | 135                    | 135                  | 720  | mg    | once          | Adverse event: vasogenic edema      |
|            | 149                    | 149                  | 370  | mg    | once          | Adverse event: vasogenic edema      |
|            | 164                    | 164                  | 370  | mg    | once          | Adverse event: vasogenic edema      |
| 2401043    | 175                    | 175                  | 320  | mg    | once          | Other: Progression of disease       |
|            | 189                    | 189                  | 320  | mg    | once          | Other: Progression of disease       |
|            | 203                    | 203                  | 320  | mg    | once          | Other: Progression of disease       |
|            | 280                    | 280                  | 640  | mg    | once          | Other: Progression of disease       |
|            | 293                    | 293                  | 640  | mg    | once          | Other: Progression of disease       |
|            | 306                    | 306                  | 320  | mg    | once          | Other: Progression of disease       |
| 2401048    | 52                     | 52                   | 385  | mg    | once          | Adverse event: vasogenic edema      |
|            | 66                     | 66                   | 385  | mg    | once          | Adverse event: vasogenic edema      |
|            | 80                     | 80                   | 385  | mg    | once          | Adverse event: vasogenic edema      |

**Supplementary Table 3.** Details of serious adverse events attributable to study treatment

| <b>Adverse Event</b>            | <b>Dose DNX-2401 (vp)</b> | <b>Days after DNX-2401 injection</b> | <b>CTCAE Grade</b> | <b>Treatment</b>                    | <b>Effect on DNX-2401 or Pembrolizumab</b> | <b>Outcome</b> | <b>Sequae</b> |
|---------------------------------|---------------------------|--------------------------------------|--------------------|-------------------------------------|--------------------------------------------|----------------|---------------|
| <b>Subject ID</b>               |                           |                                      |                    |                                     |                                            |                |               |
| <b>Dysphasia</b>                |                           |                                      |                    |                                     |                                            |                |               |
| 2401008                         | 5x10 <sup>9</sup>         | 29-41                                | 2                  | Steroids                            | None                                       | Resolved       | Yes           |
| 2401025                         | 5x10 <sup>10</sup>        | 1-4                                  | 2                  | None                                | None                                       | Resolved       | None          |
| 2401029                         | 5x10 <sup>10</sup>        | 9-10                                 | 2                  | Steroids                            | None                                       | Resolved       | None          |
| <b>Headache</b>                 |                           |                                      |                    |                                     |                                            |                |               |
| 2401009                         | 5x10 <sup>10</sup>        | 17-24                                | 2                  | Concomitant medication              | None                                       | Resolved       | None          |
| 2401031                         | 5x10 <sup>10</sup>        | 10-12                                | 2                  | Concomitant medication              | None                                       | Resolved       | None          |
| <b>Edema</b>                    |                           |                                      |                    |                                     |                                            |                |               |
| 2401015                         | 5x10 <sup>10</sup>        | 24-28                                | 3                  | Steroids                            | Interrupted                                | Resolved       | None          |
| 2401018                         | 5x10 <sup>10</sup>        | 11-20                                | 3                  | Steroids                            | None                                       | Resolved       | None          |
| 2401037                         | 5x10 <sup>10</sup>        | 65-66                                | 3                  | Concomitant medication and steroids | None                                       | Resolved       | Yes           |
| 2401040                         | 5x10 <sup>10</sup>        | 53-55                                | 3                  | Concomitant medication and steroids | Interrupted                                | Resolved       | Yes           |
| 2401042                         | 5x10 <sup>10</sup>        | 132-135                              | 4                  | Concomitant medication              | Interrupted                                | Resolved       | None          |
| 2401044                         | 5x10 <sup>10</sup>        | 39-44                                | 3                  | Steroids                            | None                                       | Resolved       | None          |
| 2401044                         | 5x10 <sup>10</sup>        | 92-96                                | 3                  | Concomitant medication              | Interrupted                                | Resolved       | Yes           |
| 2401047                         | 5x10 <sup>10</sup>        | 10-12                                | 2                  | Concomitant medication              | None                                       | Resolved       | None          |
| 2401048                         | 5x10 <sup>10</sup>        | 23-24                                | 3                  | Steroids                            | Discontinued                               | Resolved       | Yes           |
| <b>Hemiparesis</b>              |                           |                                      |                    |                                     |                                            |                |               |
| 2401025                         | 5x10 <sup>10</sup>        | 1-4                                  | 3                  | None                                | None                                       | Resolved       | None          |
| 2401029                         | 5x10 <sup>10</sup>        | 9-10                                 | 3                  | Steroids                            | None                                       | Resolved       | Yes           |
| 2401048                         | 5x10 <sup>10</sup>        | 23-26                                | 3                  | Steroids                            | Discontinued                               | Resolved       | Yes           |
| <b>Autoimmune Colitis</b>       |                           |                                      |                    |                                     |                                            |                |               |
| 2401022                         | 5x10 <sup>10</sup>        | 87-92                                | 3                  | Concomitant medication              | Discontinued                               | Resolved       | None          |
| <b>Noninfectious Meningitis</b> |                           |                                      |                    |                                     |                                            |                |               |
| 2401045                         | 5x10 <sup>10</sup>        | 4-9                                  | 3                  | Concomitant medication              | None                                       | Resolved       | None          |
| <b>Somnolence</b>               |                           |                                      |                    |                                     |                                            |                |               |
| 2401048                         | 5x10 <sup>10</sup>        | 23-24                                | 2                  | Concomitant medication              | Discontinued                               | Resolved       | None          |



| <b>Supplementary Table 4. Subsequent therapies after trial termination</b> |                                                       |                                                         |
|----------------------------------------------------------------------------|-------------------------------------------------------|---------------------------------------------------------|
| <b>Therapies</b>                                                           | <b>Declared dose population<br/>Patients, No. (%)</b> | <b>Intent-to-treat population<br/>Patients, No. (%)</b> |
| Any subsequent therapy                                                     | 30 (71)                                               | 36 (75)                                                 |
| Surgery                                                                    | 10 (24)                                               | 13 (27)                                                 |
| Laser ablation                                                             | 1 (2)                                                 | 1 (2)                                                   |
| Radiotherapy                                                               | 9 (21)                                                | 11 (23)                                                 |
| Systemic Therapy                                                           |                                                       |                                                         |
| Bevacizumab                                                                | 21 (50)                                               | 23 (48)                                                 |
| Lomustine                                                                  | 13 (31)                                               | 17 (35)                                                 |
| Pembrolizumab                                                              | 7 (17)                                                | 8 (16)                                                  |
| Temozolomide                                                               | 6 (14)                                                | 7 (15)                                                  |
| Carboplatin                                                                | 2 (5)                                                 | 3 (6)                                                   |
| Everolimus                                                                 | 2 (5)                                                 | 2 (5)                                                   |
| Imipridone                                                                 | 2 (5)                                                 | 2 (5)                                                   |
| Depatuxizumab mafodotin                                                    | 2 (5)                                                 | 2 (5)                                                   |
| Procarbazine                                                               | 1 (2)                                                 | 1 (2)                                                   |
| Etoposide                                                                  | 1 (2)                                                 | 1 (2)                                                   |
| Olaparib                                                                   | 1 (2)                                                 | 1 (2)                                                   |
| Pabinostat                                                                 | 1 (2)                                                 | 1 (2)                                                   |
| Irinotecan                                                                 | 1 (2)                                                 | 1 (2)                                                   |
| Teraepicol                                                                 | 1 (2)                                                 | 1 (2)                                                   |
| Debio1347                                                                  | 0 (0)                                                 | 1 (2)                                                   |
| Nivo                                                                       | 0 (0)                                                 | 1 (2)                                                   |
| Dabrafenib                                                                 | 0 (0)                                                 | 1 (2)                                                   |
| Trametinib                                                                 | 0 (0)                                                 | 1 (2)                                                   |

Supplementary Table 5. Molecular features with potential clinical relevance identified in pretreatment tumor biopsies

| DNX-2401 dose (vp) | Subject ID | Best Response | Investigator Reported Molecular Features <sup>2</sup> |      |      |      |                                                                                   | Targeted Sequencing Identified Molecular Features <sup>3</sup> |
|--------------------|------------|---------------|-------------------------------------------------------|------|------|------|-----------------------------------------------------------------------------------|----------------------------------------------------------------|
|                    |            |               | PD-L1 <sup>1</sup>                                    | MGMT | IDH1 | IDH2 | Other                                                                             | Selected mutations                                             |
| <b>5e8</b>         | 2401001    | SD            | POS                                                   | UNM  | WT   | WT   | MUT=1P<br>WT=19Q                                                                  | MUT=TP53 92%<br>WT=IDH1, PTEN, RB1, NF1, MTOR, POLE            |
|                    | 2401003    | SD            | POS                                                   | UNM  | WT   | WT   | MUT= GFAP, Vimentin, EGFR, OTIG2, PhosphoH3<br>KLE7 20%, TP53 rare positive cells | MUT=PTEN 55%<br>WT=IDH1, RB1, TP53, NF1, MTOR, POLE            |
|                    | 2401049    | PD            | NR                                                    | MET  | WT   | NR   | MUT=EGFR, GFAP<br>WT=KI67, P53, PTEN, VEGF                                        | WT=IDH1, PTEN, RB1, TP53, NF1, MTOR, POLE                      |
|                    | 2401011    | PD            | NEG                                                   | UNM  | WT   | WT   | MUT=EGFR, GFAP<br>WT=EGFRVIII, KI67, P53<br>ATRX retained                         | MUT=RB1 38%<br>WT=IDH1, PTEN, NF1, TP53, MTOR, POLE            |
| <b>5e9</b>         | 2401002    | PD            | POS                                                   | NR   | MUT  | NR   | NR                                                                                | MUT=IDH1 43%<br>WT=PTEN, RB1, TP53, NF1, MTOR, POLE            |
|                    | 2401008    | SD            | NEG                                                   | UNM  | WT   | NR   | MUT=P53, EGFR                                                                     | MUT=TP53 69%<br>WT=IDH1, PTEN, RB1, TP53, NF1, MTOR, POLE      |
|                    | 2401012    | SD            | NR                                                    | MET  | WT   | NR   | MUT=BRAF                                                                          | MUT=POLE 24%<br>WT=IDH1, PTEN, RB1, TP53, NF1, MTOR            |
| <b>5e10</b>        | 2401004    | PD            | POS                                                   | NR   | MUT  | WT   | MUT=ATRAX, PDGFRA, RAD50, RB1 loss, TP53                                          | MUT=IDH1 44%, PT53 93%<br>WT=RB1, TP53, NF1, MTOR, POLE        |

|         |    |     |     |     |    |                                       |                                                                   |
|---------|----|-----|-----|-----|----|---------------------------------------|-------------------------------------------------------------------|
| 2401005 | SD | NEG | UNM | WT  | WT | MUT=CDK4, ERBB3, FRS2, MDM2, SETD2    | NR                                                                |
| 2401006 | SD | POS | MET | WT  | NR | MUT=EGFR, SETD2, TERT<br>MSS, TMB-LOW | WT=IDH1, PTEN, RB1, TP53,<br>NF1, MTOR, POLE                      |
| 2401007 | PD | NEG | UNM | WT  | WT | MUT=EGFR, P53                         | NR                                                                |
| 2401009 | PD | NEG | UNM | WT  | WT | MUT=EGFR (diffuse)<br>WT=P53          | NR                                                                |
| 2401010 | PD | NR  | UNM | WT  | WT | MUT=EGFR, P53<br>KI67 26%             | NR                                                                |
| 2401013 | CR | NR  | NR  | WT  | NR | NR                                    | MUT= NF1 16%, IDH2 23%<br>WT=IDH1, PTEN, RB1, TP53,<br>MTOR, POLE |
| 2401014 | SD | POS | NR  | WT  | NR | MUT=P53<br>ATRX retained              | MUT=PTEN 72%, TP53 71%,<br>MTOR 40%<br>WT=IDH1, RB1, NF1, POLE    |
| 2401015 | PD | NR  | MET | WT  | NR | NR                                    | WT=IDH1, PTEN, RB1, TP53,<br>NF1, MTOR, POLE                      |
| 2401016 | PD | POS | NR  | WT  | NR | NR                                    | NR                                                                |
| 2401017 | SD | POS | NR  | WT  | NR | NR                                    | MUT=PTEN 21%<br>WT=IDH1, RB1, TP53, NF1,<br>MTOR, POLE            |
| 2401018 | PD | POS | UNM | WT  | NR | NR                                    | MUT=NF1 29%, MTOR 49%,<br>POLE 77%<br>WT=IDH1, PTEN, RB1, TP53    |
| 2401019 | PR | POS | MET | WT  | NR | NR                                    | MUT=IDH1 12%, TP53 29%<br>WT=RB1, NF1, MTOR, POLE                 |
| 2401020 | SD | POS | UNM | WT  | NR | WT=P53                                | NR                                                                |
| 2401021 | SD | NEG | MET | WT  | NR | MUT=EGFR, EGFRVIII<br>KI67 >50%       | NR                                                                |
| 2401022 | PD | NR  | UNM | MUT | NR | MUT=P53                               | NR                                                                |

|         |    |     |     |    |    |  |                                                                                                  |                                                                 |
|---------|----|-----|-----|----|----|--|--------------------------------------------------------------------------------------------------|-----------------------------------------------------------------|
|         |    |     |     |    |    |  | KI67 >25%                                                                                        |                                                                 |
| 2401023 | SD | NEG | MET | WT | WT |  | MUT=GFAP, P53 (IHC), RB1, BRCA1, BRCA2, MYCN, PTEN 89%, TP53 89%<br>WT=1P/19Q, ATRX, BRAF, EGFR, | MUT=PTEN 27%, RB1 25%, TP53 25%, NF1 23%, MTOR 18%, POLE 17%    |
| 2401024 | PD | NEG | MET | WT | WT |  | MUT=CDK4, EGFR, MDM2<br>KI67 HIGH                                                                | MUT=PTEN 58%<br>WT=IDH1, RB1, TP53, NF1, MTOR, POLE             |
| 2401025 | SD | NR  | UNM | WT | WT |  | MUT=GFAP, ATM, CDKN2A, PTEN, RB1, TERT, TP53<br>KI67 25-30%<br>WT=EGFRVIII                       | MUT=PTEN 34%, TP53 33%<br>WT=IDH1, RB1, NF1, MTOR, POLE         |
| 2401026 | SD | NEG | MET | WT | WT |  | MUT=PTEN<br>KI67 10-15%<br>WT=1P/19Q, EGFR, P53                                                  | NR                                                              |
| 2401027 | SD | NEG | UNM | WT | WT |  | MUT=EGFR<br>KI67 20%<br>WT=P53                                                                   | NR                                                              |
| 2401028 | PD | POS | MET | NR | NR |  | MUT=GFAP, P53<br>KI67 60%                                                                        | NR                                                              |
| 2401029 | SD | POS | UNM | WT | WT |  | MUT=22Q, ATRX, DDX3X, NF1, PTEN, TP53                                                            | MUT=PTEN 40%, RB1 45%, TP53 41%, NF1 41%<br>WT=IDH1, MTOR, POLE |
| 2401030 | PD | POS | UNM | WT | WT |  | MUT=EGFRVIII, PTEN, TERT                                                                         | NR                                                              |
| 2401031 | SD | NR  | UNM | WT | WT |  | MUT=CDKN2A, PTEN, EGFRVIII                                                                       | WT=IDH1, PTEN, RB1, TP53, NF1, MTOR, POLE                       |
| 2401032 | SD | NEG | UNM | WT | WT |  | MUT=CDKN2A, CDKN2B, CREBBP, MYCN, PTEN, TERT, TP53                                               | MUT=TP53 15%<br>WT=IDH1, PTEN, RB1, NF1, MTOR, POLE             |

|         |    |     |     |     |    |                                                                                                                                                                                                   |                                                                     |
|---------|----|-----|-----|-----|----|---------------------------------------------------------------------------------------------------------------------------------------------------------------------------------------------------|---------------------------------------------------------------------|
| 2401033 | SD | NEG | UNM | WT  | NR | MUT=CDKN2A/B, EGFRVIII, ERRF11, TERT                                                                                                                                                              | WT=IDH1, PTEN, RB1, TP53, NF1, MTOR, POLE                           |
| 2401034 | PD | NR  | UNM | WT  | WT | MUT=EBFRVIII, GFAP, P53 5%<br>KI67 30%<br>WT=1P/19Q                                                                                                                                               | NR                                                                  |
| 2401035 | PD | NR  | UNM | WT  | WT | MUT=CDK4, CDKN2AP16INK4A, CDKN2B, MDM2, PTEN                                                                                                                                                      | NR                                                                  |
| 2401036 | PD | NEG | UNM | WT  | WT | MUT=ARID5B, CDKN2A, CDKN2B, EGFR, NF1, SUFU, TERT 41%                                                                                                                                             | NR                                                                  |
| 2401037 | PD | POS | UNM | WT  | WT | MUT=1P36/1Q24, ANKRD11 6%, CDKN2AP14ARF, CDKN2AP16INK4A, CDKN2B, EGFR, FOXA1 39%, GATA3, IKBKE, IL10, KMT2B 26%, MDM4, TERT 36%                                                                   | NR                                                                  |
| 2401038 | PD | POS | MET | WT  | WT | MUT=CCND2, CDK4, EGFR, EIF1AX, FAM58A, GLI1, MDM2, SDHD, TERT                                                                                                                                     | NR                                                                  |
| 2401039 | PR | NEG | UNM | WT  | WT | MUT= CDKN2A/B, EGFRVIII, MDM4, NF1, PIK3CB, RUNX1, TERT                                                                                                                                           | WT=IDH1, PTEN, RB1, TP53, NF1, MTOR, POLE                           |
| 2401040 | PD | NEG | UNM | MUT | WT | MUT=ATRAX 59%, BAP1, BLM 19%, CDKN2AP14ARF, CDKN2AP16INK4A, CDKN2B, ERCC3 6%, MAP2K4 16%, MED12 9%, MLH1, PBRM1, PDGFRA, RAD51C 9%, SETD2, SPEN 25%, TERT 25%, TGFBR2, TP53 exon5 46%, exon 7 47% | MUT=IDH1 30%, TP53 44%, NF1 21%, MTOR 33%<br><br>WT=PTEN, RB1, POLE |
| 2401041 | SD | NR  | UNM | WT  | NR | MUT= EGFR, CDK4, MDM2, PDGFRA, PTEN 25%, TERT 22%, 19%                                                                                                                                            | NR                                                                  |

|         |    |     |     |    |    |                                                     |                                                             |
|---------|----|-----|-----|----|----|-----------------------------------------------------|-------------------------------------------------------------|
| 2401042 | PD | NEG | MET | WT | WT | MUT= CCND2, CDK4, EGFR, MET, SOX2, TERT, TP53       | NR                                                          |
| 2401043 | PD | NR  | MET | WT | WT | WT=BRAF, EGFR, PTEN                                 | NR                                                          |
| 2401044 | SD | NR  | UNM | WT | WT | MUT= glioma mutation panel<br>KI67 14%<br>WT=H3K27M | NR                                                          |
| 2401045 | CR | NR  | MET | WT | WT | WT=BRAF, TP53                                       | MUT=TP53 16%<br>WT=IDH1, PTEN, RB1, NF1, MTOR, POLE         |
| 2401046 | SD | NEG | UNM | WT | WT | MUT=TP53, ATRX, H3F3AK27M, NF1, PIK3CA, RB1         | MUT=TP53 77%, NF1 44%, POLE 57%<br>WT=IDH1, PTEN, RB1, MTOR |
| 2401047 | PR | NEG | NR  | WT | NR | MUT=H3K27M<br>ATRX retained                         | WT=IDH1, PTEN, RB1, TP53, NF1, MTOR, POLE                   |
| 2401048 | SD | NR  | UNM | WT | WT | MUT=GFAP, H3K27ME, TP53, Y236H<br>WT=H3K27M         | NR                                                          |

Assay and analysis performed by Neogenomics Inc. as directed by Merck; 2. Various assays used; 3. Targeted NGS using NeoType Discovery Profile for Solid Tumors (NeoGenomics) and/or Novogene PM2.0.(Novogene); Abbreviations: ; CR=complete response, PD=progressive disease, PR=partial response, SD=stable disease; MET=MGMT promoter methylation present/positive (methylated, hypermethylated), UNM=MGMT promoter methylation absent/negative (unmethylated), MUT= mutated/amplified/positive for mutation, WT=wild type/no amplification/benign/negative for mutation, NR=not reported/not tested

| <b>Supplementary Table 6 – Cell markers and RNA signatures</b> |                          |           |
|----------------------------------------------------------------|--------------------------|-----------|
| HUGO symbols                                                   | Cell population or score | Type      |
| BLK                                                            | B-cells                  | Cell type |
| CD19                                                           | B-cells                  | Cell type |
| MS4A1                                                          | B-cells                  | Cell type |
| TNFRSF17                                                       | B-cells                  | Cell type |
| PTPRC                                                          | CD45                     | Cell type |
| CD8A                                                           | CD8 T cells              | Cell type |
| CD8B                                                           | CD8 T cells              | Cell type |
| CTSW                                                           | Cytotoxic cells          | Cell type |
| GNLY                                                           | Cytotoxic cells          | Cell type |
| GZMA                                                           | Cytotoxic cells          | Cell type |
| GZMB                                                           | Cytotoxic cells          | Cell type |
| GZMH                                                           | Cytotoxic cells          | Cell type |
| KLRB1                                                          | Cytotoxic cells          | Cell type |
| KLRD1                                                          | Cytotoxic cells          | Cell type |
| KLRK1                                                          | Cytotoxic cells          | Cell type |
| PRF1                                                           | Cytotoxic cells          | Cell type |
| CCL13                                                          | Dendritic cells          | Cell type |
| CD209                                                          | Dendritic cells          | Cell type |
| HSD11B1                                                        | Dendritic cells          | Cell type |
| CD244                                                          | Exhausted CD8            | Cell type |
| EOMES                                                          | Exhausted CD8            | Cell type |
| LAG3                                                           | Exhausted CD8            | Cell type |
| CD163                                                          | Macrophages              | Cell type |
| CD68                                                           | Macrophages              | Cell type |
| CD84                                                           | Macrophages              | Cell type |
| MS4A2                                                          | Mast cells               | Cell type |
| TPSAB1/B2                                                      | Mast cells               | Cell type |
| CSF3R                                                          | Neutrophils              | Cell type |
| FCGR3A/B                                                       | Neutrophils              | Cell type |
| S100A12                                                        | Neutrophils              | Cell type |
| IL21R                                                          | NK CD56dim cells         | Cell type |
| KIR2DL3                                                        | NK CD56dim cells         | Cell type |
| KIR3DL1                                                        | NK CD56dim cells         | Cell type |
| KIR3DL2                                                        | NK CD56dim cells         | Cell type |
| NCR1                                                           | NK cells                 | Cell type |
| CD3D                                                           | T-cells                  | Cell type |
| CD3E                                                           | T-cells                  | Cell type |

|          |                    |                        |
|----------|--------------------|------------------------|
| CD3G     | T-cells            | Cell type              |
| CD6      | T-cells            | Cell type              |
| SH2D1A   | T-cells            | Cell type              |
| TBX21    | Th1 cells          | Cell type              |
| FOXP3    | Treg               | Cell type              |
| CCL2     | Chemokine          | Score                  |
| CCL4     | Chemokine          | Score                  |
| CCL5     | Chemokine          | Score                  |
| CCL8     | Chemokine          | Score                  |
| CCL18    | Chemokine          | Score                  |
| CCL19    | Chemokine          | Score                  |
| CCL21    | Chemokine          | Score                  |
| CXCL9    | Chemokine          | Score                  |
| CXCL10   | Chemokine          | Score                  |
| CXCL11   | Chemokine          | Score                  |
| CXCL13   | Chemokine          | Score                  |
| GZMA     | Cytolytic          | Score                  |
| PRF1     | Cytolytic          | Score                  |
| CD70     | T cell activation  | Functional orientation |
| CD244    | T cell activation  | Functional orientation |
| CD48     | T cell activation  | Functional orientation |
| CD44     | T cell activation  | Functional orientation |
| LAG3     | T cell inhibition  | Functional orientation |
| TNFRSF8  | T cell inhibition  | Functional orientation |
| CTLA4    | T cell inhibition  | Functional orientation |
| TIGIT    | T cell inhibition  | Functional orientation |
| PDCD1    | T cell inhibition  | Functional orientation |
| HAVCR2   | T cell inhibition  | Functional orientation |
| BTLA     | T cell inhibition  | Functional orientation |
| ADORA2A  | T cell inhibition  | Functional orientation |
| TNFRSF25 | T cell inhibition  | Functional orientation |
| LAIR1    | T cell inhibition  | Functional orientation |
| FOXP3    | Regulatory T cells | Functional orientation |
| TNFRSF18 | Regulatory T cells | Functional orientation |
| HLA-A    | Class I MHC        | Functional orientation |
| HLA-B    | Class I MHC        | Functional orientation |
| HLA-C    | Class I MHC        | Functional orientation |
| HLA-E    | Class I MHC        | Functional orientation |
| HLA-F    | Class I MHC        | Functional orientation |



|        |                             |                        |
|--------|-----------------------------|------------------------|
| B2M    | Class I MHC                 | Functional orientation |
| CCL2   | Myeloid cell chemotaxis     | Functional orientation |
| CCL5   | Myeloid cell chemotaxis     | Functional orientation |
| VEGFA  | Myeloid cell chemotaxis     | Functional orientation |
| CSF1   | Myeloid cell chemotaxis     | Functional orientation |
| CCL2   | M1 markers                  | Functional orientation |
| CXCL10 | M1 markers                  | Functional orientation |
| GBP2   | M1 markers                  | Functional orientation |
| IFIT3  | M1 markers                  | Functional orientation |
| SLAMF7 | M1 markers                  | Functional orientation |
| CXCL9  | M1 markers                  | Functional orientation |
| CCL8   | M1 markers                  | Functional orientation |
| IL1B   | M1 markers                  | Functional orientation |
| CD38   | M1 markers                  | Functional orientation |
| CXCL16 | M2 markers                  | Functional orientation |
| CXCR4  | M2 markers                  | Functional orientation |
| CD14   | M2 markers                  | Functional orientation |
| MRC1   | M2 markers                  | Functional orientation |
| ARG1   | M2 markers                  | Functional orientation |
| CCL13  | M2 markers                  | Functional orientation |
| MRC1   | M2 markers                  | Functional orientation |
| CCL2   | Tertiary lymphoid structure | Functional orientation |
| CCL4   | Tertiary lymphoid structure | Functional orientation |
| CCL5   | Tertiary lymphoid structure | Functional orientation |
| CCL8   | Tertiary lymphoid structure | Functional orientation |
| CCL18  | Tertiary lymphoid structure | Functional orientation |
| CCL19  | Tertiary lymphoid structure | Functional orientation |
| CCL21  | Tertiary lymphoid structure | Functional orientation |
| CXCL9  | Tertiary lymphoid structure | Functional orientation |
| CXCL10 | Tertiary lymphoid structure | Functional orientation |
| CXCL11 | Tertiary lymphoid structure | Functional orientation |

|         |                             |                        |
|---------|-----------------------------|------------------------|
| CXCL13  | Tertiary lymphoid structure | Functional orientation |
| VEGFA   | Angiogenic markers          | Functional orientation |
| VEGFB   | Angiogenic markers          | Functional orientation |
| KDR     | Angiogenic markers          | Functional orientation |
| CXCR2   | Angiogenic markers          | Functional orientation |
| HIF1A   | Angiogenic markers          | Functional orientation |
| ANGPT2  | Angiogenic markers          | Functional orientation |
| IDO1    | IFNg signaling              | Score                  |
| CXCL10  | IFNg signaling              | Score                  |
| CXCL9   | IFNg signaling              | Score                  |
| HLA-DRA | IFNg signaling              | Score                  |
| STAT1   | IFNg signaling              | Score                  |
| IFNG    | IFNg signaling              | Score                  |
| CD3D    | IFNg downstream             | Score                  |
| IDO1    | IFNg downstream             | Score                  |
| CD3E    | IFNg downstream             | Score                  |
| CCL5    | IFNg downstream             | Score                  |
| GZMK    | IFNg downstream             | Score                  |
| CD2     | IFNg downstream             | Score                  |
| HLA-DRA | IFNg downstream             | Score                  |
| CXCL13  | IFNg downstream             | Score                  |
| IL2RG   | IFNg downstream             | Score                  |
| NKG7    | IFNg downstream             | Score                  |
| HLA-E   | IFNg downstream             | Score                  |
| CXCR6   | IFNg downstream             | Score                  |
| LAG3    | IFNg downstream             | Score                  |
| CXCL10  | IFNg downstream             | Score                  |
| STAT1   | IFNg downstream             | Score                  |
| GZMB    | IFNg downstream             | Score                  |

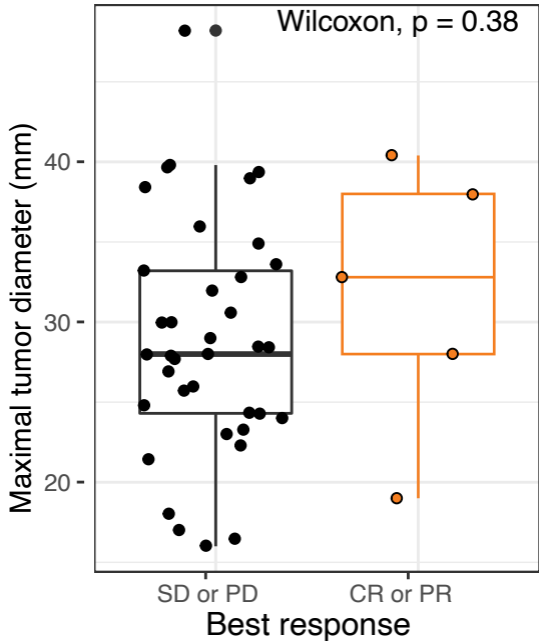

**Figure S1. Tumor size comparisons between responders and non-responders in patients who received declared dose DNX-2401 and pembrolizumab (n=42 independent samples).** Shown are the distribution of maximal tumor size in mm for each patient. On the left are patients who had either stable disease (SD) or progressive disease (PD), and on the right are patients who had complete response (CR) or partial response (PR). Central bars of boxplots indicate medians, the box defines the upper and lower quartiles of the distribution, and the whiskers define the  $1.5\times$  interquartile range (IQR)

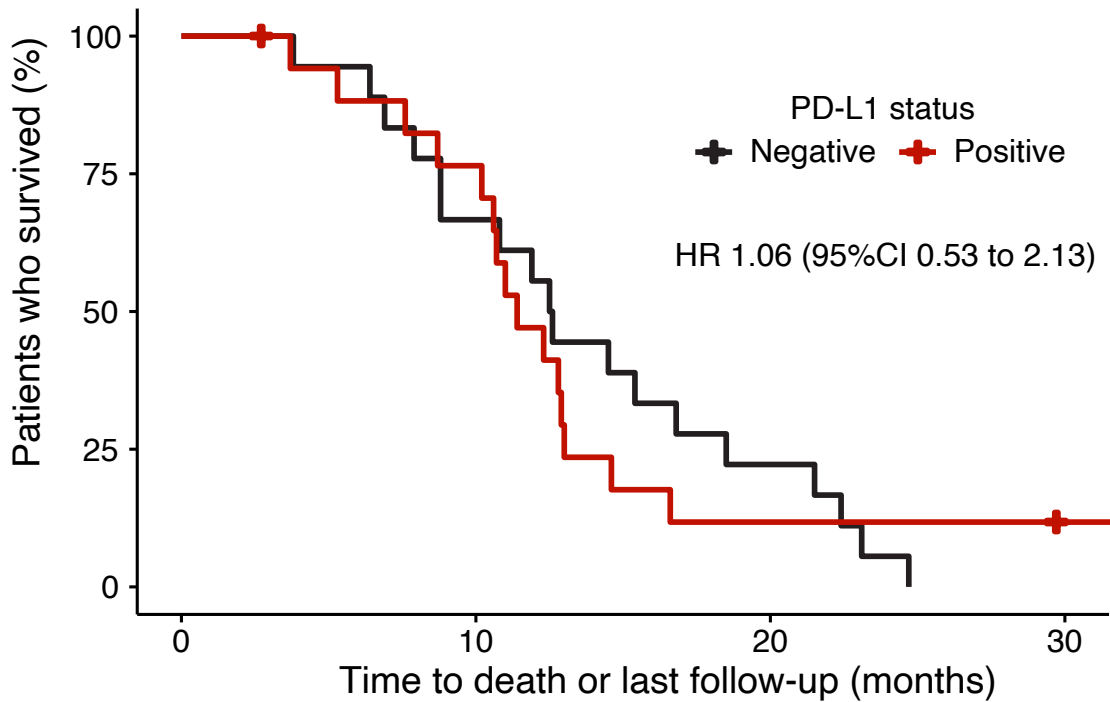

Number at risk

|          | 0  | 10 | 20 | 30 |
|----------|----|----|----|----|
| Negative | 18 | 12 | 4  | 0  |
| Positive | 18 | 13 | 2  | 1  |

Time to death or last follow-up (months)

**Supplementary Figure 2. Survival of patients treated with  $5 \times 10^{10}$  DNX-2401 and pembrolizumab.** + denote censored data. Patients stratified according to response to tumor expression of PD-L1 by immunohistochemistry (n=18 positive and n=18 negative).
